# Supplementary material
Source: HighWire-hosted journal article supplement (https://jitc.bmj.com/content/13/4/e011108)
Supplement: inline-supplementary-material-2 [file inline-supplementary-material-2.pdf]

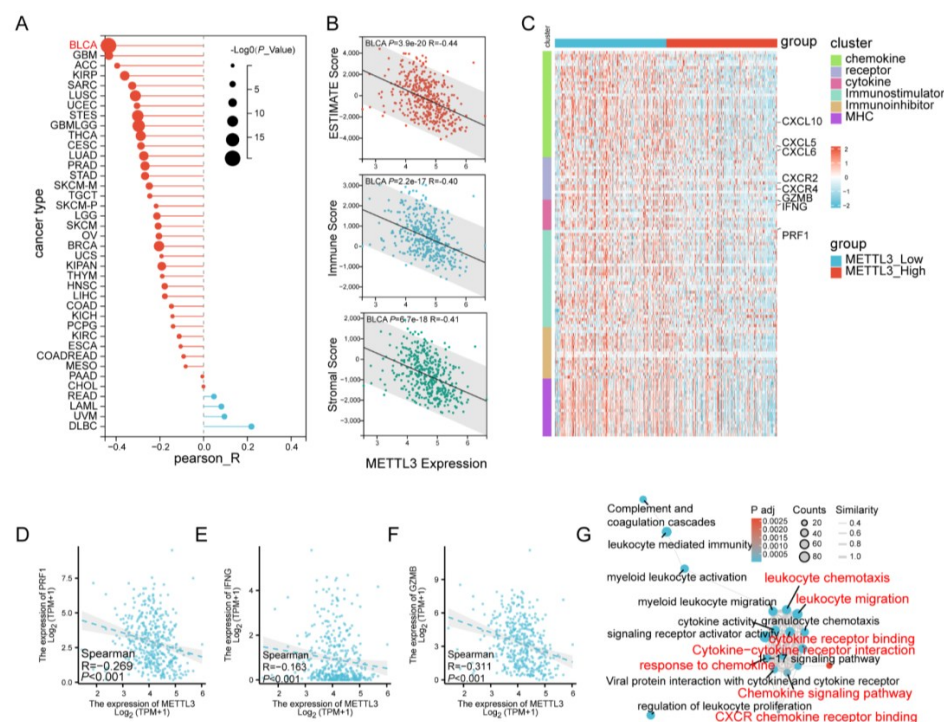

**Supplementary Figure S1. High expression of METTL3 is associated with the formation of an inhibitory immune microenvironment.** (A) Pan-cancer analysis of the correlation between METTL3 expression levels and ESTIMATE Score under the ESTIMATE algorithm; (B) Scatter plots showing the correlation (Pearson correlation) between METTL3 and ESTIMATE Score, Immune Score, and Stromal Score in bladder cancer patients from the TCGA cohort; (C) Heatmap of cytokine, chemokine, and other expression levels in METTL3 high-expression and low-expression groups from the TCGA bladder cancer cohort; Scatter plots showing the correlation between METTL3 expression and functional marker genes of CD8<sup>+</sup> T cells in the TCGA bladder cancer cohort: (D) PRF1, (E) IFNG, and (F) GZMB; (G) GO enrichment analysis network plot of differentially expressed genes in high versus low METTL3 expression groups in the TCGA bladder cancer cohort.

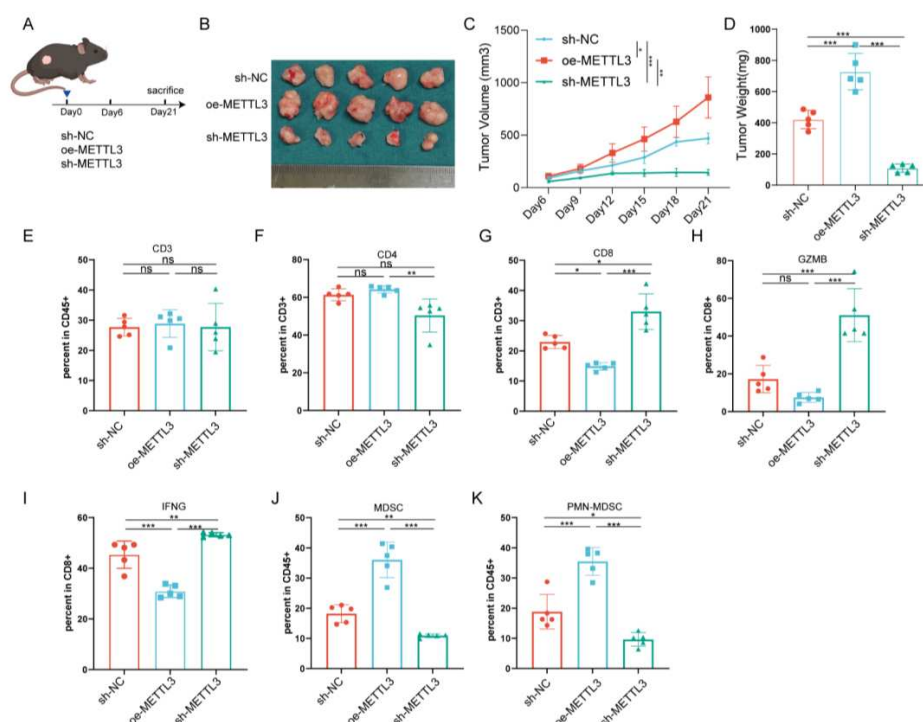

**Supplementary Figure S2. Silencing METTL3 inhibits bladder cancer progression in female mice and improves the tumor microenvironment.** (A) Schematic of the animal experiment: control, METTL3-silenced, or METTL3-overexpressing MB49 cells were subcutaneously injected into mice, and on day 12, flow cytometry was performed to analyze the tumor immune microenvironment (n=5), along with the assessment of tumor growth in mice (n=5); (B) Images of bladder cancer tumors in mice; (C) Growth curves of bladder cancer tumors in mice; (D) Tumor weights of bladder cancer tumors in mice; (E-K) Analysis results of the immune microenvironment in bladder cancer tumors from mice. \*,  $P < 0.05$ ; \*\*,  $P < 0.01$ ; \*\*\*,  $P < 0.001$ .

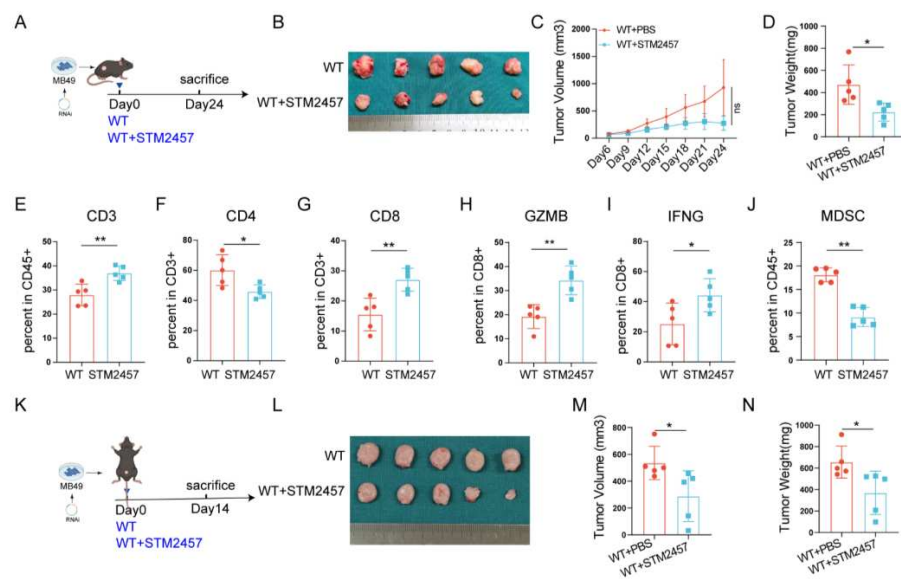

### Supplementary Figure S3. STM2457 targets METTL3 to inhibit bladder cancer

**progression.** (A) Animal experiment schematic: wild-type MB49 cells were subcutaneously implanted into the backs of mice, which were then randomly divided into two groups. One group received intratumoral injections of STM2457 (250  $\mu\text{g}/\text{tumor}$ , once daily). Tumors were harvested on day 24 ( $n=5$ ). (B) Images of mouse bladder cancer tumors. (C) Tumor growth curves in mice. (D) Tumor volumes in mice. (E-J) Analysis results of the immune microenvironment in bladder cancer tumors from mice; (K) Animal experiment schematic: wild-type MB49 cells were subcutaneously implanted into the backs of mice, which were then randomly divided into two groups. One group received intraperitoneal injections of STM2457 (25  $\text{mg}/\text{kg}$ , once daily). Tumors were harvested on day 24 ( $n=5$ ). (L) Images of mouse bladder cancer tumors. (M) Tumor growth curves in mice. (N) Tumor volumes in mice. ns, no significance; \*,  $P < 0.05$ ; \*\*,  $P < 0.01$ ; \*\*\*,  $P < 0.001$ .

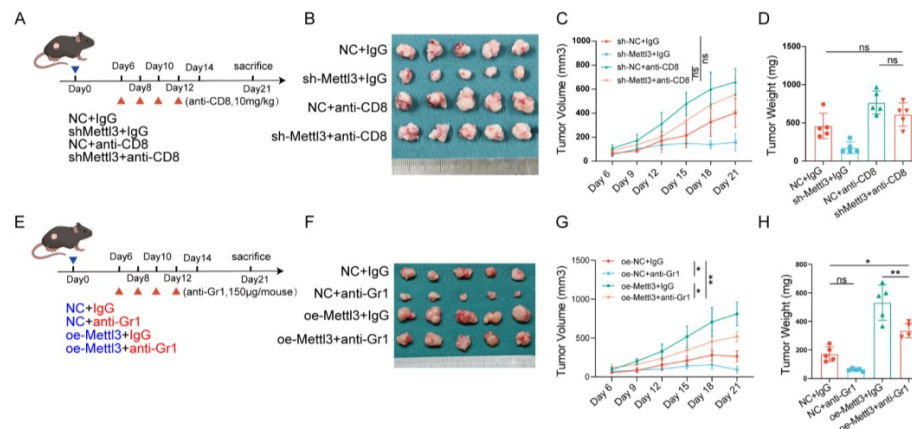

**Supplementary Figure S4. The regulation of bladder cancer progression by METTL3 is dependent on CD8+ T cells and MDSCs.** (A) Schematic of the animal experiment workflow where control and METTL3-knockdown MB49 stable cell lines were subcutaneously implanted in the backs of mice, followed by treatment with anti-CD8 antibody or IgG antibody starting on day 6 (n=5); (B) Images of mouse bladder cancer tumors; (C) Growth curve of mouse bladder cancer tumors; (D) Weight of mouse bladder cancer tumors; (E) Schematic of the animal experiment workflow where control and METTL3-overexpressing MB49 stable cell lines were subcutaneously implanted in the backs of mice, followed by treatment with the anti-Gr-1 antibody or IgG starting on day 6 (n=5); (F) Images of mouse bladder cancer tumors; (G) Growth curve of mouse bladder cancer tumors; (H) Volume of mouse bladder cancer tumors. ns, no significance; \*,  $P < 0.05$ ; \*\*,  $P < 0.01$ ; \*\*\*,  $P < 0.001$ .

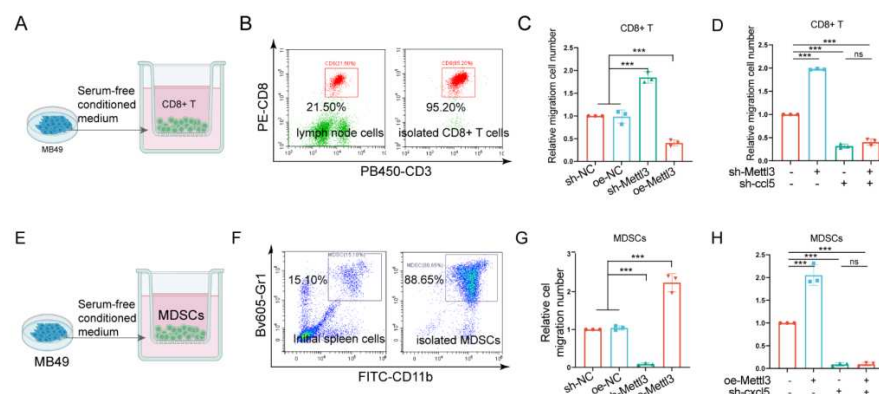

**Supplementary Figure S5. METTL3 regulates the chemotaxis of CD8+ T cells and MDSCs by controlling the secretion of CCL5 and CXCL5, respectively.** (A) Schematic of CD8+ T cells co-cultured with conditioned media from MB49 cells, where CD8+ T cells were resuspended in serum-free media and cultured in the upper chamber; (B) Flow cytometry analysis of CD8+ T-cell enrichment from mouse lymph node cells; (C) Statistical analysis of CD8+ T-cell chemotaxis after METTL3 overexpression or knockdown; (D) Statistical analysis of CD8+ T-cell chemotaxis after METTL3 knockdown and/or CCL5 interference; (E) Schematic of the MDSC and MB49 cell-conditioned media co-culture experiment, where serum-free conditioned media is placed in the lower chamber and MDSCs are resuspended in serum-free media and placed in the upper chamber; (F) Flow cytometry analysis showing the enrichment of MDSCs from mouse spleen cells; (G) Results of MDSC chemotaxis experiments following METTL3 knockdown or overexpression; (H) MDSC chemotaxis results following METTL3 knockdown and/or CXCL5 knockdown. ns, no significance; \*,  $P < 0.05$ ; \*\*,  $P < 0.01$ ; \*\*\*,  $P < 0.001$ .

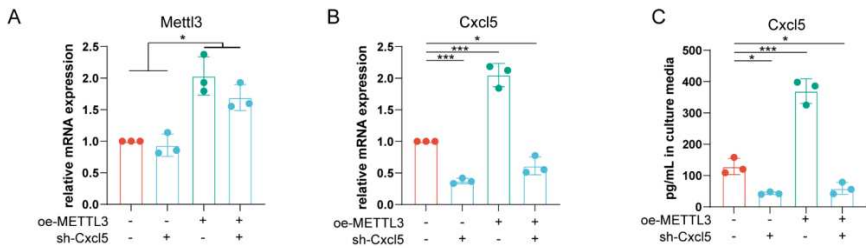

**Supplementary Figure S6. Construction of stable CXCL5 knockdown MB49 cell lines.** (A-C) Verification of METTL3 and CXCL5 mRNA expression levels and CXCL5 secretion levels in MB49 cell lines with METTL3 overexpression and/or CXCL5 knockdown. ns, no significance; \*,  $P < 0.05$ ; \*\*,  $P < 0.01$ ; \*\*\*,  $P < 0.001$ .

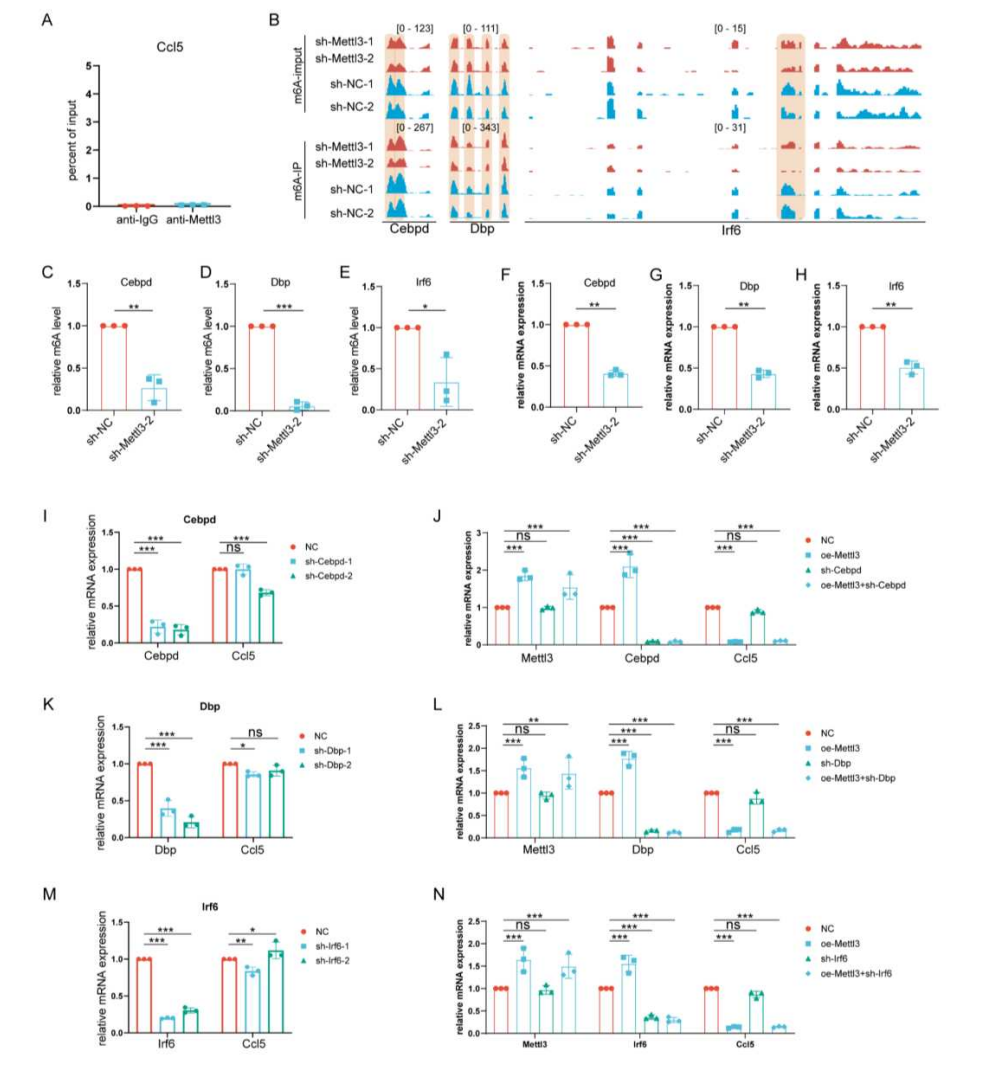

**Supplementary Figure S7. The regulation of CCL5 expression by METTL3 is independent of CEBPD, DBP, and IRF6.** (A) RIP-qPCR analysis of METTL3 enrichment in CCL5 mRNA in MB49 cells; (B) Peak plot illustrating m6A modification changes in CEBPD, DBP, and IRF6 after METTL3 knockdown; (C-E) MeRIP-qPCR analysis of m6A modification levels of CEBPD, DBP, and IRF6 after METTL3 knockdown in MB49 cells; (F-H) RT-qPCR analysis of CEBPD, DBP, and IRF6 mRNA expression levels following METTL3 knockdown in MB49 cells; (I) RT-qPCR analysis showing changes in CCL5 expression after CEBPD knockdown; (J) RT-qPCR analysis



of CCL5 mRNA expression changes following METTL3 and/or CEBPD knockdown; (K) RT-qPCR analysis showing changes in CCL5 expression after DBP knockdown; (L) RT-qPCR analysis of CCL5 mRNA expression changes following METTL3 and/or DBP knockdown; (M) RT-qPCR analysis showing changes in CCL5 expression after IRF6 knockdown; (N) RT-qPCR analysis of CCL5 mRNA expression changes following METTL3 and/or IRF6 knockdown. ns, no significance; \*,  $P < 0.05$ ; \*\*,  $P < 0.01$ ; \*\*\*,  $P < 0.001$ .

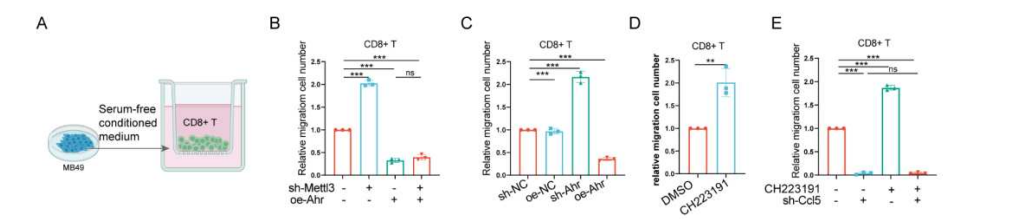

**Supplementary Figure S8. AHR is a key gene in METTL3-regulated CD8+ T cell chemotaxis via CCL5.** (A) Schematic diagram of cell co-culture; (B) CD8+ T cell chemotaxis after METTL3 knockdown and/or AHR overexpression; (C) CD8+ T cell chemotaxis after AHR knockdown or overexpression; (D) CD8+ T cell chemotaxis after treatment of MB49 cells with the AHR inhibitor CH223191; (E) CD8+ T cell chemotaxis after treatment of MB49 cells with AHR inhibitor CH223191 and/or si-CCL5. ns, no significance; \*,  $P < 0.05$ ; \*\*,  $P < 0.01$ ; \*\*\*,  $P < 0.001$ .



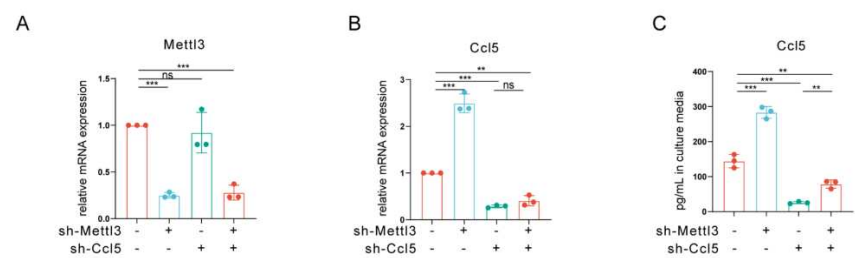

**Supplementary Figure S9. Construction of stable CCL5 knockdown MB49 cell lines.** (A-C) Verification of METTL3 and CCL5 mRNA expression levels and CCL5 secretion levels in MB49 cell lines with METTL3 knockdown and/or CCL5 knockdown. ns, no significance; \*,  $P < 0.05$ ; \*\*,  $P < 0.01$ ; \*\*\*,  $P < 0.001$ .

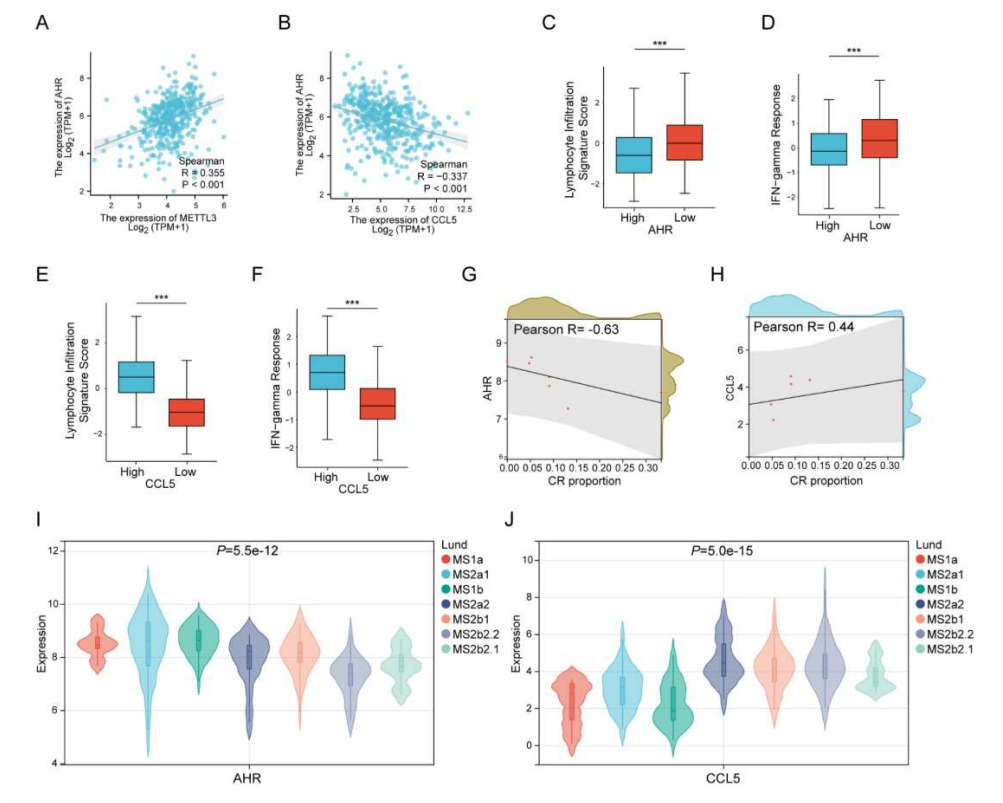

**Supplementary Figure S10. METTL3 regulates bladder cancer progression through the AHR-CCL5 axis.** (A-B) Correlation scatter plot between AHR and METTL3 or CCL5 expression levels in the TCGA BLCA cohort. Statistical analysis of Lymphocyte Infiltration Signature Score and IFN-gamma Response in the CAMOIP database in patients with different expression levels of (C-D) AHR and (E-F) CCL5. (G-H) Correlation scatter plots of AHR and CCL5 expression levels with the complete response (CR) rate in patients with different Lund subtypes in the Imvigor210 cohort. (I-J) AHR and CCL5 expression levels across different Lund subtypes in the Imvigor210 cohort. \*,  $P < 0.05$ ; \*\*,  $P < 0.01$ ; \*\*\*,  $P < 0.001$ .

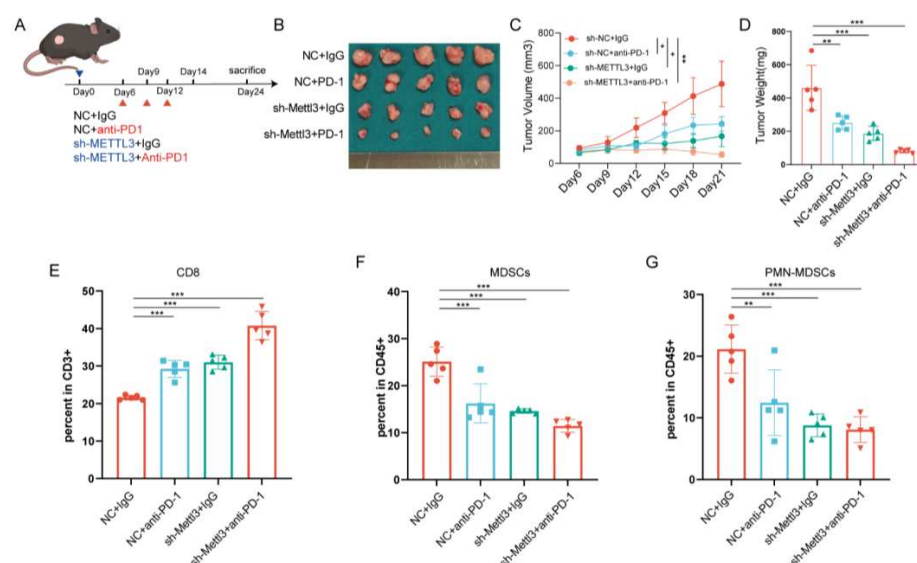

**Supplementary Figure S11. Silencing METTL3 enhances anti-PD-1 treatment efficacy in female mice with bladder cancer.** (A) Control and METTL3-knockdown MB49 stable cell lines were subcutaneously injected into mice. Anti-PD-1 antibody (200 µg/mouse, every three days) was administered intraperitoneally starting on day 6. Tumors were harvested on day 14 for flow cytometric analysis of the immune microenvironment (n=5) and tumor growth assessment (n=5); (B-D) Images, growth curves, and tumor weights of subcutaneous bladder cancer tumors in mice; (E-G) Flow cytometric analysis of MDSCs and CD8+ T cell infiltration levels in the tumor tissues of mouse bladder cancer. ns, no significance; \*,  $P < 0.05$ ; \*\*,  $P < 0.01$ ; \*\*\*,  $P < 0.001$ .
